# Supplementary material for: A permittivity regulating strategy to achieve high-performance electromagnetic wave absorbers with compatibility of impedance matching and energy conservation
Source: Royal Society of Chemistry journal article supplement (doi:10.1039/c6nj03052a), 2017-01-01
Supplement: c6nj03052a1.pdf [file c6nj03052a1.pdf]

## Electronic Supplementary Information

Permittivity regulating strategy to achieve high-performance  
electromagnetic wave absorbers with compatibility of  
impedance matching and energy conservation

*Bin Quan*<sup>a</sup>, *Xiaohui Liang*<sup>a</sup>, *Guoyue Xu*<sup>a</sup>, *Yan Cheng*<sup>a</sup>, *Yanan Zhang*<sup>a</sup>, *Wei Liu*<sup>a</sup>,

*Guangbin Ji*<sup>a\*</sup>, *Youwei Du*<sup>b</sup>

<sup>a</sup> College of Materials Science and Technology, Nanjing University of Aeronautics  
and Astronautics, Nanjing, 210016, P. R. China

<sup>b</sup> Laboratory of Solid State Microstructures, Nanjing University, Nanjing 210093, P.  
R. China

\* Corresponding authors: E-mail: [gbji@nuaa.edu.cn](mailto:gbji@nuaa.edu.cn) (G.B. Ji)

**Table S1.** Experimental parameters (material, temperature, time, and so on) for the preparation of three MoS<sub>2</sub>/RGO composites.

| Sample No. | Raw reagents                                                                         | Hydrothermal conditions |
|------------|--------------------------------------------------------------------------------------|-------------------------|
| C1         | 0.2 g MoS <sub>2</sub> + 2 mL GO + 58 mL H <sub>2</sub> O + 15 mL anhydrous ethanol  | 150 °C, 10 h            |
| C2         | 0.2 g MoS <sub>2</sub> + 3 mL GO + 57 mL H <sub>2</sub> O + 15 mL anhydrous ethanol  |                         |
| M1         | 0.2 g MoS <sub>2</sub> + 4 mL GO + 56 mL H <sub>2</sub> O + 15 mL anhydrous ethanol  |                         |
| C3         | 0.2 g MoS <sub>2</sub> + 5 mL GO + 55 mL H <sub>2</sub> O + 15 mL anhydrous ethanol  |                         |
| M2         | 0.2 g MoS <sub>2</sub> + 6 mL GO + 54 mL H <sub>2</sub> O + 15 mL anhydrous ethanol  |                         |
| M3         | 0.2 g MoS <sub>2</sub> + 8 mL GO + 52 mL H <sub>2</sub> O + 15 mL anhydrous ethanol  |                         |
| C4         | 0.2 g MoS <sub>2</sub> + 10 mL GO + 50 mL H <sub>2</sub> O + 15 mL anhydrous ethanol |                         |
| C5         | 0.2 g MoS <sub>2</sub> + 20 mL GO + 40 mL H <sub>2</sub> O + 15 mL anhydrous ethanol |                         |
| C6         | 0.2 g MoS <sub>2</sub> + 30 mL GO + 30 mL H <sub>2</sub> O + 15 mL anhydrous ethanol |                         |

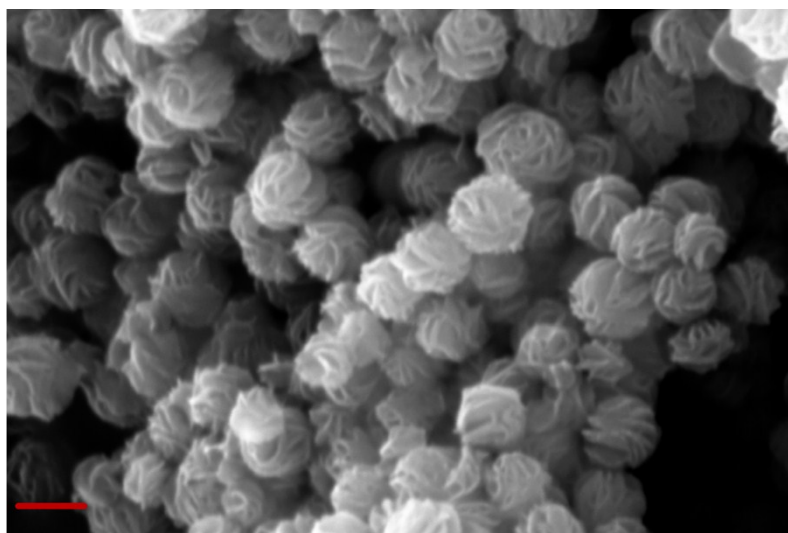

**Figure S1.** SEM images of flower-like MoS<sub>2</sub> spheres. Scale bar is 200 nm.

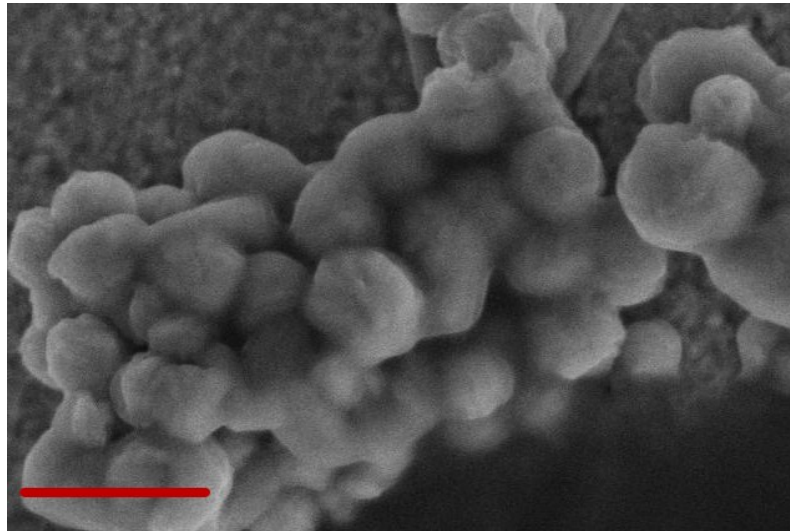

**Figure S2.** SEM images of MoS<sub>2</sub>/rGO composites synthesized with 20 mL GO. Scale bar is 200 nm.

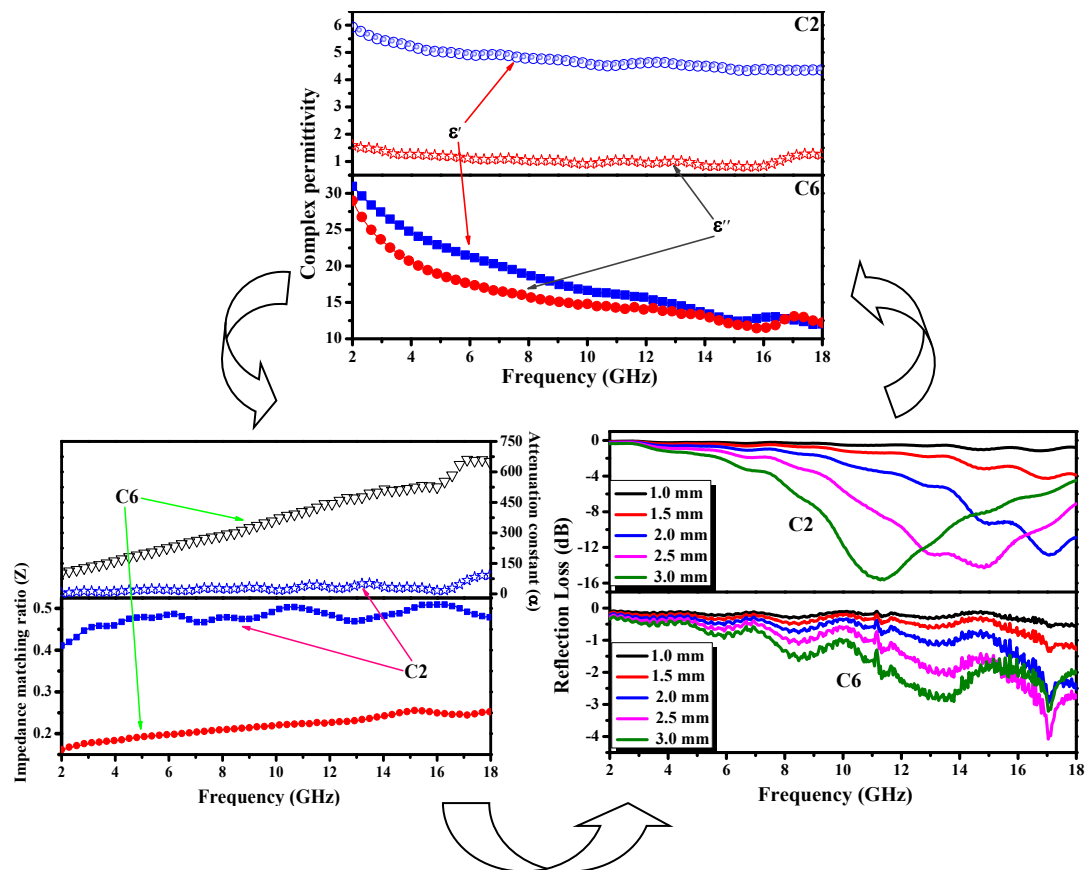

**Figure S3.** The relationship between complex permittivity, impedance matching, attenuation ability and reflection loss for C2 and C6 samples.
